# Supplementary material for: Hypoxia-Induced MicroRNA-212/132 Alter Blood-Brain Barrier Integrity Through Inhibition of Tight Junction-Associated Proteins in Human and Mouse Brain Microvascular Endothelial Cells
Source: PubMed Central journal article supplement (PMC6842347; doi:10.1007/s12975-018-0683-2), 2019-01-08
Supplement: 12975_2018_683_MOESM1_ESM.pdf [file 12975_2018_683_MOESM1_ESM.pdf]

**Hypoxia-induced microRNA-212/132 alter blood-brain barrier integrity through inhibition of tight junction-associated proteins in human and mouse brain microvascular endothelial cells**

Malgorzata Burek<sup>1\*</sup>, Anna König<sup>1</sup>, Mareike Lang<sup>1</sup>, Jan Fiedler<sup>2</sup>, Sabrina Oerter<sup>3</sup>, Norbert Roewer<sup>1</sup>, Michael Bohnert<sup>3</sup>, Serge C. Thal<sup>4</sup>, Kinga G. Blecharz-Lang<sup>5</sup>, Johannes Woitzik<sup>6</sup>, Thomas Thum<sup>2</sup>, Carola Y. Förster<sup>1</sup>

<sup>1</sup>Department of Anesthesiology and Critical Care, University of Würzburg, Würzburg, Germany

<sup>2</sup> Hannover Medical School, Institute of Molecular and Translational Therapeutic Strategies (IMTTS), Hannover, Germany

<sup>3</sup> Institute of Forensic Medicine, University of Würzburg, Würzburg, Germany

<sup>4</sup>Department of Anesthesiology, Medical Center of the Johannes Gutenberg-University Mainz, Mainz, Germany

<sup>5</sup> Department of Experimental Neurosurgery, Charité – Universitätsmedizin Berlin, Corporate Member of Freie Universität Berlin, Humboldt-Universität zu Berlin and Berlin Institute of Health, Berlin, Germany

<sup>6</sup> Department of Neurosurgery and Center for Stroke Research Berlin (CSB), Charité - Universitätsmedizin Berlin, Berlin, Germany

\*Corresponding author: Malgorzata Burek, PhD, Universitätsklinikum Würzburg, Klinik und Poliklinik für Anästhesiologie, Oberdürrbacher Straße 6, 97080 Würzburg, Germany; Phone: +4993120130046; Fax: +4993120130019, E-mail: Burek\_M@ukw.de

**SUPPLEMENTAL INFORMATION\_ Burek *et al.***

### Supplemental Figure 1

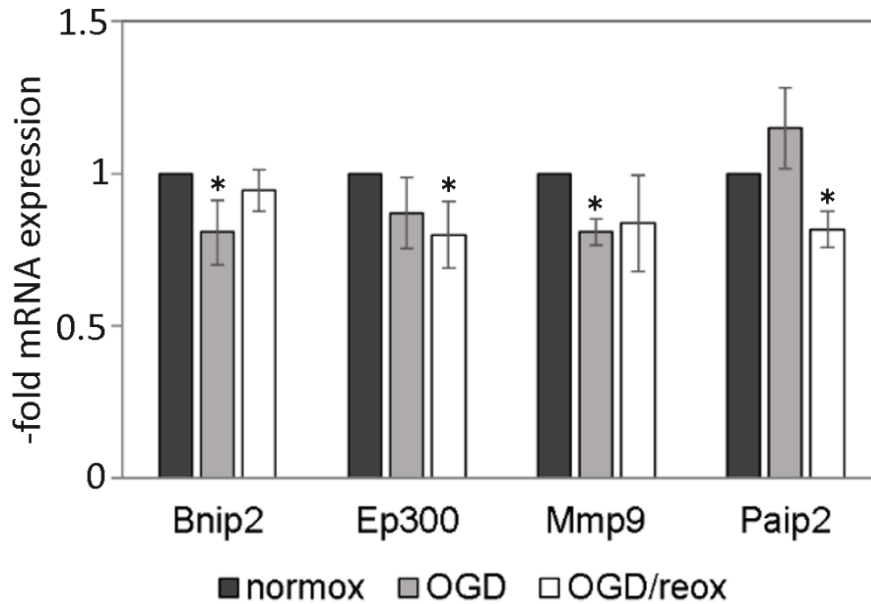

**Supplemental Figure 1.** Expression of predicted / validated miR-212/132 targets in hypoxic cEND cells. mRNA expression of Bcl2/adenovirus E1B 19 kDa-interacting protein (Bnip2), E1A Binding Protein P300 (Ep300), Matrix metalloproteinase (Mmp9) and Polyadenylate-Binding Protein- Interacting Protein 2 (Paip2), all predicted / validated targets of miR-212/132 was analyzed in cEND subjected to 4-hour-OGD (OGD) with or without 20-hour-re-oxygenation (OGD/reox) by qPCR. Data are presented as average of three independent experiments with standard deviations, \*  $p < 0.05$ .
